# Supplementary material for: Optimized architecture for Tyrosinase-containing Langmuir–Blodgett films to detect pyrogallol
Source: Royal Society of Chemistry journal article supplement (doi:10.1039/c0jm03864d), 2011-01-01
Supplement: c0jm03864d.pdf [file c0jm03864d.pdf]

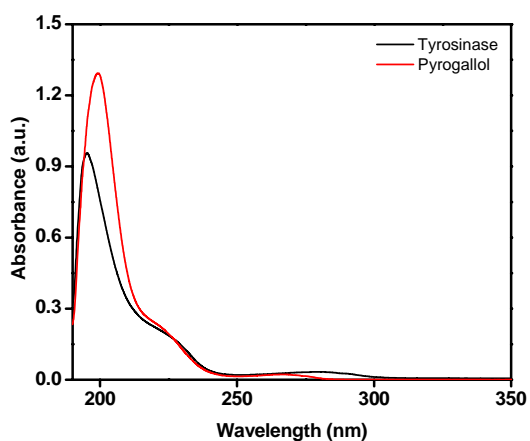

UV-Vis, spectra for tyrosinase and pyrogallol in phosphate buffer solution (pH 7.0; 0.01 M).

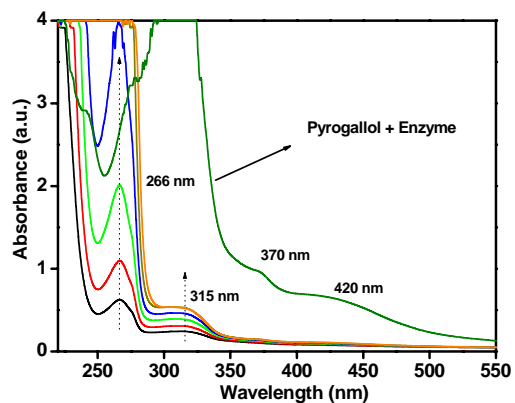

UV-Vis spectra for pyrogallol (measurements are made at intervals of 10 min) and upon addition of tyrosinase to the pyrogallol solution: Note that at high concentration of pyrogallol (13 mM) the band at 315 nm also appears due to the self-oxidation process.

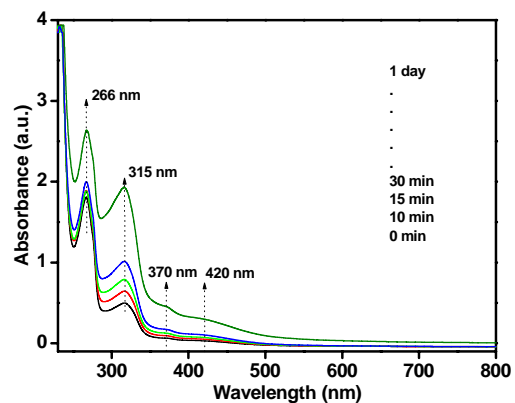

UV-Vis spectra for pyrogallol solution after LB film containing AA+Tyr (10 layers) immersion.
